# Supplementary material for: Mitochondrial Metabolomics of Sym1-Depleted Yeast Cells Revealed Them to Be Lysine Auxotroph
Source: MDPI journal article supplement (doi:10.3390/cells12050692), 2023-02-22
Supplement: s1 [file s1]

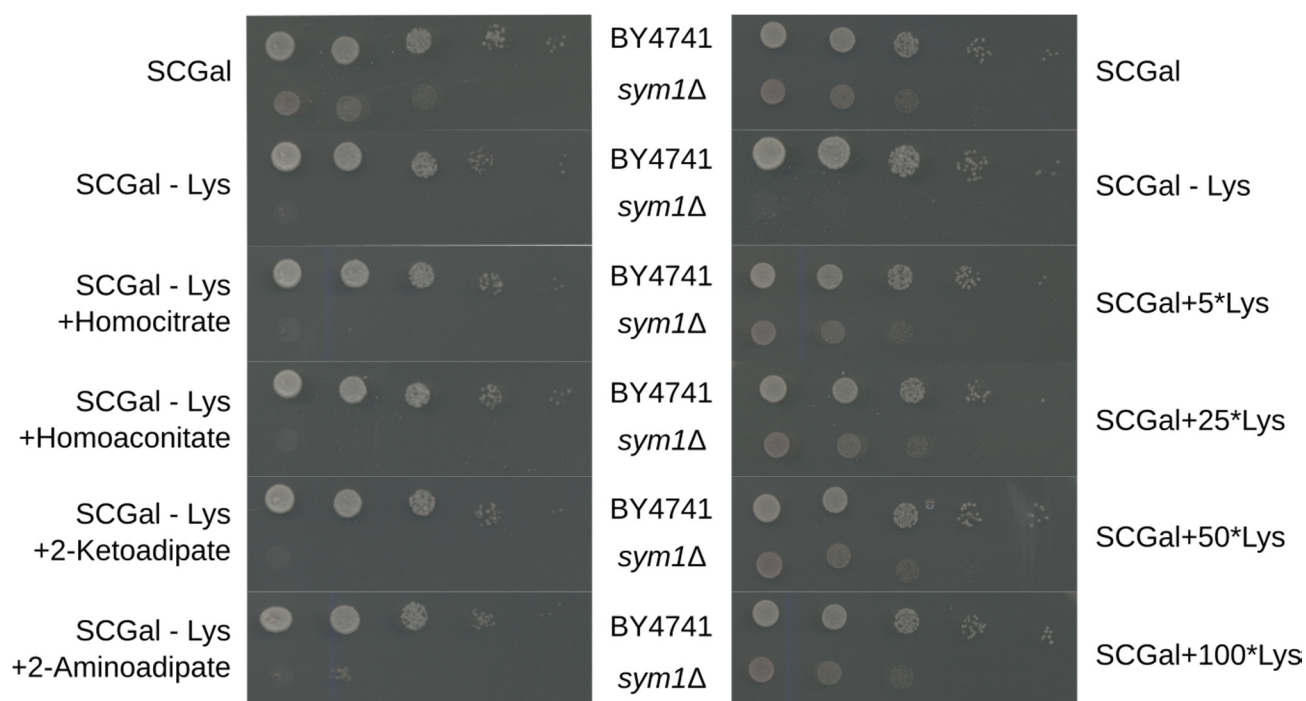

Figure S1: Phenotype test of WT and *sym1*Δ cells with addition of lysine in various concentrations (right) and intermediates of lysine biosynthesis (left).
