# Supplementary material for: Mitochondrial Metabolomics of Sym1-Depleted Yeast Cells Revealed Them to Be Lysine Auxotroph
Source: Cells. 2023 Feb 22;12(5):692. doi: 10.3390/cells12050692 (PMC10000845; doi:10.3390/cells12050692)
Supplement: Supplementary file 1 [file cells-12-00692-s001.zip › Supplementary Table S1.xlsx]

## Sheet: for metabo
Genotype	WT	WT	WT	sym1Δ	sym1Δ	sym1Δ	WT	WT	WT	sym1Δ	sym1Δ	sym1Δ
Compartment	Mito	Mito	Mito	Mito	Mito	Mito	Cyto	Cyto	Cyto	Cyto	Cyto	Cyto
Replicate	1	2	3	1	2	3	1	2	3	1	2	3
14-Demethyllanosterol	0.0899605	0.0634114	0.0817619	0	0	0	NA	NA	NA	NA	NA	NA
1-Monopalmitin	0.00872154	0.0109493	0.00777017	0.0100651	0.0092444	0.00874285	NA	NA	NA	NA	NA	NA
2-AAA	NA	NA	NA	NA	NA	NA	0	0	0	0.0262459	0.0353922	0.0329738
2-PG	NA	NA	NA	NA	NA	NA	0.0279074	0.0385141	0.0372786	0.0249317	0.033056	0.029587
1-Octadecanol	0.00302201	0.0023461	0.00293166	0.00222045	0.00281096	0.00203716	NA	NA	NA	NA	NA	NA
3-Aminoisobutyric acid	0.00128093	0.000624096	0.00042769	0.000950578	0.000229854	5.45781e-05	NA	NA	NA	NA	NA	NA
3-hydroxy-3-methylglutaric acid	NA	NA	NA	NA	NA	NA	0	0.00843353	0.00845497	0.0783481	0.0848498	0.0843508
3-Hydroxybutyric acid	NA	NA	NA	NA	NA	NA	0.00584146	0.00549912	0.00509931	0.00415814	0.00805242	0.0057015
3-PG	0.011231	0.0128435	0.0126542	0.0165251	0.016153	0.0144475	0.406442	0.37632	0.359737	0.422562	0.529451	0.457782
5-Methyluridine	0.0152954	0.0184913	0.0206259	0.0158401	0.0177515	0.0143736	NA	NA	NA	NA	NA	NA
4-Aminobutanoic acid	NA	NA	NA	NA	NA	NA	0.0177806	0.0186576	0.0157753	0.0102825	0.0139079	0.0114124
Adenine	0.00116945	0.000827411	0.00117377	0.00080889	0.00190127	0.00140542	NA	NA	NA	NA	NA	NA
Adenosine	0.0949273	0.0476493	0.0601509	0.0422066	0.0602037	0.058502	2.4183	2.44606	2.49352	1.56215	1.77454	1.59686
Alanine	0.0433866	0.0414043	0.0441955	0.094085	0.0880093	0.0987393	1.08954	1.14345	1.00258	1.44342	1.62605	1.61773
Aminomalonic acid	0.0013901	0	0	0.00406974	0.00465177	0.00236078	0.0131629	0.0118299	0.00527121	0.00579452	0.00721314	0.00938389
AMP	0.0437494	0	0	0	0.0212633	0	0.326053	0.384242	0.397369	0.536082	0.643996	0.505707
Arginine	6.92123	6.69665	6.61308	2.79399	2.78704	2.75776	58.215	56.5606	56.6712	22.0791	21.5154	21.9254
Argininosuccinate	0.000673856	0.0008529	0.00130624	0.00151034	0.00128507	0.00125715	0.0185138	0.0206672	0.0170807	0.0202501	0.0160017	0.0224521
Asparagine	0.182598	0.200796	0.200241	0.381741	0.386351	0.394058	0.257335	0.315612	0.280475	0.180785	0.419448	0.424145
Aspartate	0.0583419	0.0546749	0.0494763	0.0922887	0.0901243	0.0933455	0.334435	0.523667	0.325948	0.495557	0.625986	0.544275
Cadaverine	NA	NA	NA	NA	NA	NA	0.0232526	0.0144575	0.0173336	0.00567881	0.00729881	0.00707788
Carbamoyl-Asp	103793	103065	101480	27240.5	26942.1	26778.9	237068	232832	239342	59006.1	60240.3	59085.3
Citrate	0.000565713	0.000552632	0.00050062	0.00162185	0.00172978	0.00171449	0.00732662	0.00694982	0.00643835	0.0075893	0.00994643	0.00872988
Citrulline	0.00752842	0.0120906	0.0127337	0.219607	0.22529	0.222496	0.0549805	0.0675867	0.0668106	1.16641	1.21881	1.22437
CMP	148966	147531	148009	112592	110907	112008	308330	305825	309720	323073	327126	326335
Cystathionine	0.0670179	0.0547048	0.0579432	0.127522	0.143835	0.145573	0.182636	0.188885	0.188047	0.544565	0.666758	0.595594
Cysteine	0.00356631	0.00539982	0.00384162	0.00342494	0.00312877	0.00272059	0.0697038	0.0721724	0.0636085	0.0228305	0.0271616	0.0258718
Cytidine	73947.3	73598.9	73659.3	73432.9	70932.9	72804.1	58703.8	59221	58196.7	88650.3	87733.5	89055
Cytosine	633.767	627.56	631.727	327.636	309.529	368.321	1841.69	1568.58	1589.68	1393.34	1233.63	1377.56
dCMP	967.549	839.872	888.367	990.049	1019.12	980.117	817.658	1018.54	851.702	1774.1	1697.8	1832.13
dCytidine	648.154	646.496	545.52	773.591	736.265	679.776	NA	NA	NA	NA	NA	NA
Decanoic acid	0.00591532	0.00593802	0.00653922	0.0053451	0.00557845	0.00478121	0.0212374	0.0169614	0.0186924	0.0167262	0.0188402	0.0175197
Eicosanoic acid	0.00550835	0.00425954	0.00431261	0.00518165	0.004313	0.00412192	NA	NA	NA	NA	NA	NA
Ergost-8(14)-en-3-ol, (3?)-,	0	0	0	0	0.00628346	0.00711001	NA	NA	NA	NA	NA	NA
Ergosterol	2.30908	1.32681	2.8694	1.55553	2.48174	3.7495	0.24405	0.230146	0.196196	0.150511	0.200629	0.154242
Ethanolamine	0.0051605	0.0108681	0.00066097	0.0100641	0.00370407	0	0.0111515	0.0130575	0.0113881	0.00760056	0.00668644	0.00735995
Fructose-6P	NA	NA	NA	NA	NA	NA	0.0400338	0.035818	0.0371273	0	0.0810446	0.0756367
Fumarate	0.000326342	0.000271747	0.0002512	0.000448512	0.000455355	0.000453571	0.00437145	0.00563668	0.00486933	0.0298134	0.0202492	0.0271662
Galactinol	0.0050237	0.0100328	0	0.0180881	0.0177722	0.014537	NA	NA	NA	NA	NA	NA
Galactitol	2.5048	2.63992	2.40045	0.111033	0.108872	0.107932	11.8531	11.8958	11.7906	3.40708	4.26973	3.8892
Gentiobiose	0	0.0104531	0.00635501	0.00753897	0	0	3.7806	3.78105	3.61488	3.15694	3.42011	2.87387
Gluconic acid	NA	NA	NA	NA	NA	NA	0.0355544	0.0305211	0.0306296	0	0	0
Glucose	0.842261	0.763446	0.699939	0.762555	0.849273	0.822571	0.10437	0.0848986	0.0732909	0.121922	0.220231	0.156265
Glucose-6P	0.0104298	0.0156107	0.0112584	0.014935	0.0138381	0.0101057	0.0848892	0.068224	0.0676232	0.153739	0.147555	0.150023
Glutamate	0.228181	0.208794	0.174141	0.296348	0.288402	0.310669	5.39415	5.31891	4.94035	6.72111	8.38801	8.34211
Glutamine	0.0066271	0.0083339	0.00710678	0.0774059	0.0735416	0.0821146	0.360961	0.374149	0.324936	1.79243	2.4981	2.51719
Glyceric acid	0.0146374	0.0062635	0.00735192	0.00413764	0.00772971	0.00655959	0.0366852	0.0342715	0.0373909	0.0353412	0.0297997	0.0266439
Glycerol-3P	0.0972894	0.0957165	0.0898194	0.135499	0.138989	0.130812	0.0589084	0.0632248	0.0663306	0.0900518	0.0879132	0.0623567
Glycine	0.0415311	0.0418712	0.0413041	0.0587849	0.0591778	0.0595321	0.0478045	0.0561598	0.0547212	0.0517346	0.052021	0.0605102
Glycolic acid	0.000463318	0	0.000467649	0.000878434	0	0.00067204	0.00556441	0.00537402	0.00523906	0.00490168	0.00558921	0.0050055
Guanine	NA	NA	NA	NA	NA	NA	0	0	0.00970044	0.0112612	0	0.00426105
GSH	1.54848e+06	1.53934e+06	1.54569e+06	1.39459e+06	1.36593e+06	1.3333e+06	1.59193e+06	1.58164e+06	1.59176e+06	1.92403e+06	1.92105e+06	1.92912e+06
GSSG	81748.4	82296.1	85669	79929.1	79569.8	77479.1	95054.7	93531.3	96975.8	96244.7	95741.3	96914.1
GSH_GSSG	18.942	18.7049	18.0426	17.4478	17.1665	17.2086	16.7476	16.9103	16.414	19.991	20.065	19.9054
Hexacosanoic acid	0.0087152	0.0108641	0.00787072	0.00707266	0.007383	0.00565973	NA	NA	NA	NA	NA	NA
Histidine	1.2996	1.31606	1.34975	1.81972	1.83818	1.88919	21.1382	22.5136	22.0592	21.3266	20.9845	21.7723
Homocysteine	0	0	0	0.00217234	0.00248782	0.00343139	0.00354202	0	0.00339205	0.00793203	0.0058541	0.00625773
Homoserine	NA	NA	NA	NA	NA	NA	0.0050477	0.00504973	0.00481752	0.00373617	0.00476972	0.00377372
Hypoxanthine	NA	NA	NA	NA	NA	NA	0.0375919	0.0392058	0.0374799	0.00888812	0.0107674	0.010726
Isoleucine	0.0202239	0.0150606	0.0141581	0.0336833	0.0244272	0.0328419	4.13593	4.30817	4.16479	3.00268	2.9811	3.02352
Kynurenine	NA	NA	NA	NA	NA	NA	0	0	0	0.020645	0.0203575	0.0197179
Lactate	0.00507103	0.0182985	0	0.0177966	0.0122981	0	0.0662992	0.0225335	0.0483643	0.0164999	0.00433935	0.0119652
Lanosterol	0.1195	0.108098	0.0938308	0.0320416	0	0	NA	NA	NA	NA	NA	NA
Lauric acid	0.0327038	0.0354679	0.0306528	0.0179698	0.0173181	0.0173914	NA	NA	NA	NA	NA	NA
Lactose	NA	NA	NA	NA	NA	NA	0.214633	0.219255	0.185996	0.277997	0.452253	0.365775
Leucine	0.0210926	0.0175486	0.0174369	0.0280543	0.0240404	0.0271773	0.434565	0.440488	0.431804	0.293687	0.301168	0.282066
Lysine	0.0831308	0.0712705	0.064913	0.0315982	0.0356088	0.0340029	40.6771	41.2035	40.8907	24.7676	24.4891	24.9412
Malate	0.00702378	0.0063194	0.00765784	0.0143563	0.0147115	0.013982	0.138082	0.141769	0.126703	0.586855	0.685931	0.650017
Maltose	0.324378	0.341686	0.298414	0.310465	0.310098	0.296723	NA	NA	NA	NA	NA	NA
Mannose-6P	NA	NA	NA	NA	NA	NA	0.854356	0.814576	0.726865	1.07548	1.2195	1.07419
Methionine	0.00857621	0.00741449	0.00795956	0.00650476	0.00638222	0.00661333	0.151662	0.157446	0.127913	0.058319	0.0737713	0.0653685
Methyl phosphate	0.018171	0.0121253	0.00633571	0.0124582	0.010636	0.00728448	NA	NA	NA	NA	NA	NA
Myo-inositol	0.165901	0.152902	0.140218	0.203891	0.208006	0.205132	0.070166	0.066571	0.0636948	0.0530731	0.0620609	0.0560432
Myristic acid	0.0178713	0.0198263	0.0176803	0.00970934	0.00970135	0.0103081	NA	NA	NA	NA	NA	NA
NAD+	537091	532067	545234	245532	241162	236674	2832.29	2614.37	2731.02	2595.22	2358.4	2503.74
NADP+	1366.4	1384.19	1375.12	1877.25	2077.68	1891.97	745.098	745.036	697.343	1495.87	1505.28	1693.4
Nicotinamide	0.0294961	0.0306875	0.027593	0.0133008	0.0134746	0.0140385	0.011371	0.0111068	0.00855402	0.010721	0.0128831	0.0130808
Oleic acid	0.0537495	0.0689247	0.0576966	0.145689	0.120263	0.110406	0.038147	0.0340925	0.0214306	0.0524709	0.0235822	0.0394942
O-Phosphocolamine	0.0110707	0.0105493	0.00800367	0.011076	0.00876029	0.00819557	NA	NA	NA	NA	NA	NA
Ornithine	1.2888	1.33083	1.34376	1.28109	1.28022	1.27682	2.20704	2.29766	1.94836	0.68158	0.839978	0.735204
Orotic acd	107695	105809	108454	59197.7	58024.4	57870.8	108524	110781	108096	51448.2	52669.9	51748.1
Palmitic acid	0.357449	0.233693	0.262956	0.355955	0.283339	0.295087	0.196298	0.150305	0.1293	0.17942	0.20949	0.168947
Palmitoleic acid	0.106764	0.14839	0.123821	0.243291	0.202964	0.183261	0.0582851	0.0731907	0.0545107	0.0780042	0.0633683	0.0687057
PEP	NA	NA	NA	NA	NA	NA	0.00617552	0.00622481	0.00572692	0.00666915	0.00833047	0.00762929
Phenylalanine	0.0177438	0.0170094	0.0153038	0.0207723	0.0211766	0.0213423	0.58884	0.641387	0.595648	0.402955	0.415474	0.384154
Phytosphingosine	0.00351518	0	0.00326242	0.0157826	0.00979107	0.0109814	NA	NA	NA	NA	NA	NA
Proline	0.00402061	0	0.00327252	0.00999689	0.00597175	0.0162822	0.121205	0.135784	0.0965419	0.281953	0.253391	0.42548
Putrescine	NA	NA	NA	NA	NA	NA	0.0163639	0.0114689	0.0133687	0	0	0
Pyroglutamate	0.0710032	0.0680973	0.0724021	0.0892897	0.115169	0.104812	NA	NA	NA	NA	NA	NA
Ribose	0	0	0	0.0378275	0.0390158	0.0380304	0.0761478	0.0961459	0.079425	0.138344	0.128035	0.12489
Saccharopine	NA	NA	NA	NA	NA	NA	0	0.0137231	0.0170965	0.10322	0.124163	0.09379
Sedoheptulose-7P	NA	NA	NA	NA	NA	NA	0.00638467	0	0	0.0149813	0.0219643	0.0174294
Serine	0.49059	0.461894	0.507893	0.43321	0.432271	0.419072	0.436223	0.414416	0.400527	0.175352	0.170543	0.192666
Squalene	0.0677284	0.0679601	0.0566262	0	0	0	NA	NA	NA	NA	NA	NA
Spermidine	NA	NA	NA	NA	NA	NA	0.570854	0.546752	0.441183	0.165164	0.298632	0.273088
Stearic acid	0.223381	0.153584	0.217975	0.290801	0.191933	0.201711	0.182681	0.128451	0.104505	0.134935	0.16905	0.133332
Threonine	0.188174	0.195771	0.1963	0.522449	0.515752	0.526503	2.64614	2.85412	2.78183	3.71242	3.78569	3.82949
Trehalose	0.138897	0.13871	0.12103	0.15125	0.158423	0.139858	0.70853	0.667684	0.610636	0.657207	0.876198	0.760134
Tryptophan	0.00505428	0.00514708	0.00465977	0.0133975	0.0134711	0.0128687	0.217214	0.251489	0.223025	0.347042	0.356711	0.33823
Tyrosine	0.0222767	0.0203083	0.0193675	0.0448599	0.0431704	0.0436536	0.816821	0.833669	0.829927	0.943353	1.06061	1.01879
Tyrosol	NA	NA	NA	NA	NA	NA	0.00549942	0.00657948	0.00524625	0.0232621	0.0273722	0.0253768
UMP	30763.5	31017	30445.2	44430.5	44308.5	44224.7	181073	177674	181502	232489	237229	235692
Uracil	3429.74	3509.67	3360.72	2430.53	3287.01	2897.43	74326.2	73615	74567.6	38509.2	39380.3	38798.5
Uridine	14142.4	14155.6	14177.6	26033.6	25318.9	24683.9	30397.6	30186.8	29818.2	79004.5	80060.7	78395.3
Valine	0.0203225	0.0181299	0.0183041	0.0288568	0.0289703	0.0305708	0.51535	0.560532	0.496668	0.413562	0.473614	0.466074
Succinate	0.000348835	0.000361944	0.000278657	0.000450055	0.000468554	0.00046746	0.00664955	0.00706558	0.0064782	0.0128715	0.0143697	0.0140225
Pyruvate	0.000121282	0.000136279	0.000106846	0.000228007	0.000235052	0.000202257	0.002871	0.00301103	0.00286578	0.0014546	0.00124342	0.001338
Xanthine	NA	NA	NA	NA	NA	NA	0.170895	0.130019	0.178925	0.122448	0.13105	0.119179
