# Supplementary material for: Mitochondrial Metabolomics of Sym1-Depleted Yeast Cells Revealed Them to Be Lysine Auxotroph
Source: Cells. 2023 Feb 22;12(5):692. doi: 10.3390/cells12050692 (PMC10000845; doi:10.3390/cells12050692)
Supplement: Supplementary file 1 [file cells-12-00692-s001.zip › Supplementary Table S2.xlsx]

## Sheet: pca_loadings
Metabolite	PC1	PC2	PC3	PC4	PC5	PC6	PC7	PC8	PC9	PC10	PC11	PC12
14-Demethyllanosterol	-0.067616	-0.020778	-0.27567	-0.0077531	-0.083017	-0.10081	-0.12326	0.014239	-0.0042133	0.11121	0.10206	0.8042
1-Monopalmitin	-0.11504	0.012866	0.0061802	-0.04928	0.050404	0.12533	0.11979	0.016463	-0.0074869	-0.052274	-0.086113	-0.021087
2-AAA	0.072737	0.16883	-0.045172	-0.064978	-0.048651	0.011014	0.047945	0.051494	0.050961	0.010265	0.021801	-0.13726
2-PG	0.1128	-0.040112	0.0080789	-0.020351	-0.035991	0.11938	-0.16671	0.12438	0.043617	-0.050941	0.051447	-0.077119
1-Octadecanol	-0.11397	0.0084199	-0.043049	-0.0054876	-0.055416	-0.062106	-0.041814	0.026404	-0.049454	0.073318	0.40824	-0.21385
3-Aminoisobutyric acid	-0.08403	-0.0026112	-0.12391	-0.2677	0.26991	-0.092563	-0.23955	0.2264	-0.10284	0.21299	0.02436	-0.0082536
3-hydroxy-3-methylglutaric acid	0.077845	0.1629	-0.045482	0.00098554	0.0073624	0.022061	-0.0099215	0.004414	0.0079944	0.0066437	0.02169	-0.26312
3-Hydroxybutyric acid	0.11249	0.0036586	-0.0029382	-0.13734	-0.1074	-0.02028	0.05467	0.15785	0.03929	-0.14115	0.030635	0.079611
3-PG	0.11634	0.020238	-0.0075926	-0.04302	-0.017725	-0.030494	0.035817	0.03891	-0.014432	-0.051137	0.0154	0.045186
5-Methyluridine	-0.11435	0.0087053	-0.031101	0.013365	-0.051173	0.039945	0.075175	-0.1236	0.12801	-0.082198	0.29759	0.016305
4-Aminobutanoic acid	0.10905	-0.075822	0.016734	-0.063101	-0.041262	0.000637	-0.032245	0.0057482	-0.062914	-0.085923	0.0041258	0.050232
Adenine	-0.10439	0.019844	0.073227	0.10895	-0.18265	-0.057645	0.033844	0.095453	-0.23023	0.10423	0.49066	-0.019135
Adenosine	0.11058	-0.072448	0.012729	-0.0025266	0.0016953	-0.0013595	-0.036326	0.067151	-0.00913	-0.015519	0.017897	0.01183
Alanine	0.11458	0.045951	-0.0059837	-0.027965	-0.0079604	0.0049803	-0.0093751	-0.02497	-0.031035	0.015547	-0.0031057	-0.021501
Aminomalonic acid	0.093817	-0.051704	0.10551	-0.20268	-0.037164	-0.078414	0.083926	-0.3504	-0.32906	0.18637	0.1388	-0.04646
AMP	0.11286	0.050299	-0.022838	-0.0087201	0.00014988	-0.0023485	-0.060183	0.14709	-0.034963	-0.11556	0.071402	-0.037969
Arginine	0.090756	-0.13987	0.0097338	0.005462	0.0081584	-0.004243	-0.025367	0.017237	-0.019993	0.023039	0.0001779	-0.0028222
Argininosuccinate	0.11531	-0.0056977	0.0035984	0.022834	0.035742	0.036724	-0.064089	-0.18167	-0.068467	0.1552	-0.012383	-0.013348
Asparagine	0.01901	0.077829	0.25204	-0.26189	-0.24077	0.20571	-0.031623	0.15849	0.24811	0.1761	-0.020913	0.07137
Aspartate	0.11131	0.049041	0.0068192	-0.073279	-0.050025	0.081149	-0.14935	-0.049534	-0.12325	-0.14169	0.0042026	0.022239
Cadaverine	0.088056	-0.13555	0.031121	-0.035857	0.0022315	-0.14724	0.20906	0.033467	0.023593	0.098408	-0.032423	-0.010387
Carbamoyl-Asp	0.055178	-0.18967	-0.071055	0.0055502	-0.018781	0.019347	-0.031488	0.039742	0.010024	0.02444	0.0075832	-0.0022873
Citrate	0.11482	0.032945	0.02906	-0.062543	-0.032395	-0.023973	0.036401	0.049429	-0.01981	-0.041622	0.0070405	0.032304
Citrulline	0.068261	0.1797	0.0046071	0.00070603	0.022693	-0.010969	0.027139	-0.015907	-0.0091543	0.0086496	0.010752	0.0057974
CMP	0.11594	-0.003563	-0.052116	0.010083	0.013247	-0.0040789	-0.009227	0.0080444	-0.0096446	0.019329	0.0087483	-0.068578
Cystathionine	0.086851	0.14759	0.0052109	-0.032804	-0.022402	-0.016112	0.02317	0.071374	-0.0046302	-0.044056	0.01863	-0.019396
Cysteine	0.091542	-0.13637	0.027432	-0.03065	-0.012768	0.02138	-0.03539	-0.025932	-0.053925	-0.015743	-0.0077156	-0.0056961
Cytidine	0.0095424	0.21481	-0.073653	-0.0039932	0.029033	-0.018306	0.016795	-0.084112	0.0046141	0.015214	-0.085276	0.066053
Cytosine	0.1089	-0.068266	-0.05605	0.022212	0.024406	-0.068968	0.070744	-0.078449	-0.042492	0.097749	-0.071666	-0.059452
dCMP	0.066354	0.17886	-0.01642	0.0047418	0.024368	0.019036	-0.11765	-0.094326	-0.12165	0.094794	0.058807	0.041952
dCytidine	-0.11511	0.017856	0.04861	-0.051199	0.040293	0.033521	0.029366	0.049468	-0.032069	0.0061232	0.0095017	-0.036489
Decanoic acid	0.11491	-0.030728	-0.014443	-0.024134	0.00099581	-0.090701	0.11983	0.039501	0.032158	0.016571	0.077675	0.00011706
Eicosanoic acid	-0.11528	0.011906	-0.013313	-0.081932	0.050623	-0.055512	-0.086291	0.073585	-0.021034	0.071951	0.012228	-0.04886
Ergost-8(14)-en-3-ol	-0.050678	0.030725	0.23017	0.2406	-0.29544	-0.0038155	0.14082	0.16423	-0.35904	0.062236	-0.20023	-7.3053e-05
Ergosterol	-0.10309	0.014605	0.05158	0.13243	-0.24711	-0.20003	-0.12068	-0.0083673	0.010647	0.040593	-0.28182	-0.011635
Ethanolamine	0.060157	-0.10069	-0.01747	-0.22942	0.38245	0.40199	0.11219	-0.0052745	-0.099242	-0.10337	-0.031971	0.10887
Fructose-6P	0.090452	0.044009	-0.0044391	-0.27909	-0.25663	0.10861	0.10225	0.22733	0.27148	0.22353	0.029294	0.023856
Fumarate	0.085937	0.13964	-0.039816	0.088321	0.095866	-0.00076283	-0.022954	-0.16001	-0.081762	0.11731	-0.013298	0.071982
Galactinol	-0.086518	0.030332	0.20342	-0.072579	0.13111	0.17305	0.17296	0.1022	-0.12249	-0.048621	-0.029714	0.11761
Galactitol	0.082375	-0.1559	-0.029987	-0.013788	-0.021133	0.025619	-0.029486	0.042475	-0.0023817	0.0046304	0.0012941	-0.041261
Gentiobiose	0.11521	-0.038646	0.0044641	-0.0032938	0.012536	-0.023212	-0.016264	0.028392	-0.046104	-0.082403	0.012375	-0.023725
Gluconic acid	0.061781	-0.18516	0.04574	-0.015095	0.0014579	-0.055273	0.045151	-0.00057536	-0.026784	0.031299	-0.021385	-0.02754
Glucose	-0.11491	0.033124	0.012166	-0.038974	-0.050481	-0.005678	0.039918	0.10439	-0.085723	0.012076	-0.015991	-0.010554
Glucose-6P	0.10549	0.091786	-0.028466	0.0063761	0.047841	-0.043471	0.082339	-0.060406	-0.045611	0.012387	0.013447	0.0053449
Glutamate	0.11384	0.049323	-0.012231	-0.048955	-0.027666	0.0080057	0.018077	0.0083814	0.0034353	0.049334	0.0009194	0.011897
Glutamine	0.084278	0.14955	-0.03049	-0.069166	-0.050577	0.025783	0.040168	0.020382	0.051996	0.077873	0.007981	-0.021936
Glyceric acid	0.1108	-0.048301	-0.02728	0.070573	0.057004	-0.11436	-0.063418	0.14188	-0.18164	0.015734	0.047522	-0.027721
Glycerol-3P	-0.090065	0.076935	0.16305	0.017118	0.084063	-0.043625	-0.0090716	0.17957	-0.11243	-0.30357	0.11556	0.025786
Glycine	0.030788	0.052312	0.30294	-0.0043267	0.0076109	0.23563	-0.23674	-0.010123	0.068006	0.31436	-0.04575	-0.036285
Glycolic acid	0.11629	-0.019024	0.0096093	-0.033848	0.01437	-0.060499	-0.044188	0.020067	0.023634	-0.038616	-0.081778	0.0055426
Guanine	0.059438	0.026407	-0.021131	0.45901	0.36131	0.019373	-0.1436	0.24823	0.20034	0.16288	0.088676	0.0016366
GSH	0.090534	0.10614	-0.14377	-0.0049592	0.036602	-0.008541	0.0156	-0.039548	0.012285	0.028464	0.097634	-0.11518
GSSG	0.11297	-0.0087856	-0.071814	0.040107	0.026225	-0.02386	0.0010289	-0.028893	0.1706	0.052433	0.24752	-0.018327
GSH_GSSG	0.024448	0.18161	-0.17706	-0.058137	0.038854	0.016664	0.025476	-0.011569	-0.17618	-0.0045143	-0.12242	0.02693
Hexacosanoic acid	-0.11142	0.0029928	-0.082264	-0.039793	0.028317	0.15346	0.15123	0.013806	-0.042044	-0.037412	0.087768	-0.027443
Histidine	0.11677	-0.016372	0.0061521	0.015875	0.022259	0.016239	-0.045836	-0.0030488	-0.023346	0.023593	0.0080719	-0.058949
Homocysteine	0.076117	0.13474	0.073022	0.16503	0.1227	-0.20512	0.22775	0.094081	0.037298	0.089692	-0.19244	0.043543
Homoserine	0.11385	-0.047377	0.0079224	-0.03981	-0.022425	-0.018397	-0.0090984	0.073921	-0.023862	-0.11031	0.019468	0.020928
Hypoxanthine	0.083196	-0.15359	0.0377	-0.012575	-0.0099873	0.024256	-0.059689	0.022821	-0.015515	0.012722	0.0023235	-0.018995
Isoleucine	0.11226	-0.062756	0.012787	0.008484	0.016942	0.0093597	-0.045377	0.0013454	-0.031042	0.010036	0.0040198	-0.007406
Kynurenine	0.07296	0.16981	-0.048599	0.019099	0.033039	-0.025881	0.027225	-0.024574	-0.03134	-0.032768	0.012351	-0.016011
Lactate	0.054276	-0.15265	0.044214	-0.0083312	0.22998	-0.12686	0.5212	0.062017	0.08027	0.19798	0.075791	0.033677
Lanosterol	-0.075247	-0.019181	-0.26256	-0.076668	0.032739	0.030187	-0.025553	0.027842	0.0044108	0.051277	-0.066678	-0.12523
Lauric acid	-0.10496	-0.0045669	-0.15187	-0.017251	-0.025064	0.07489	0.067838	-0.0029246	0.00084159	-0.01058	-0.067279	-0.019341
Lactose	0.10682	0.076391	-0.021642	-0.11475	-0.088167	0.0034612	0.03318	0.090491	0.023021	-0.085742	0.025529	-0.018114
Leucine	0.11023	-0.073891	0.019777	0.0039746	0.017702	-0.0069848	-0.038458	0.024284	-0.032293	-0.02099	-0.0012538	0.064132
Lysine	0.10822	-0.084137	0.017279	0.0099668	0.016623	0.0049415	-0.037393	0.012585	-0.0219	0.016916	0.0056073	0.0040625
Malate	0.089672	0.14043	-0.036325	-0.026356	-0.008591	-0.006513	0.027424	0.0064066	-0.0014356	-0.0082557	0.016828	-0.032819
Maltose	-0.11671	0.011323	-0.014182	-0.026124	0.00074649	0.051042	0.054439	0.022737	-0.017961	-0.0082665	-0.019388	-0.039067
Mannose-6P	0.11415	0.045956	-0.016906	-0.031141	-0.0042781	-0.040703	0.029562	-0.0031065	-0.056125	-0.076647	0.0064371	0.064088
Methionine	0.097682	-0.11886	0.025094	-0.050254	-0.028933	-0.0038724	-0.04039	-0.049941	-0.09086	-0.038863	-0.012985	0.026768
Methyl phosphate	-0.10366	0.0067105	-0.054629	-0.15383	0.14562	0.015242	-0.059382	0.30769	-0.32269	0.21261	0.02029	-0.028729
Myo-inositol	-0.11089	0.011341	0.10665	-0.045465	-0.0026542	-0.014652	0.017658	0.087374	-0.074477	0.013412	-0.046816	0.070113
Myristic acid	-0.10515	-0.0043411	-0.14967	-0.0021826	-0.044156	0.071439	0.071958	-0.021686	0.019716	-0.023444	-0.087406	0.0052643
NAD+	-0.10347	-0.0057394	-0.16211	-0.006895	-0.050558	0.016445	0.01481	-0.033276	0.043072	0.00083797	0.026187	-0.031224
NADP+	-0.062322	0.16831	0.12181	-0.01158	-0.011098	0.026059	0.078826	-0.057208	-0.048361	0.1251	0.16775	0.11107
Nicotinamide	-0.078048	0.0016184	-0.2522	-0.058447	-0.09013	0.074211	0.093118	-0.060342	-0.056341	0.030771	-0.11295	-0.077017
Oleic acid	-0.087123	0.043479	0.19834	-0.048129	0.18357	-0.00093087	0.048191	-0.21894	-0.0074305	-0.036756	0.015042	0.05966
O-Phosphocolamine	-0.11445	0.010649	-0.019959	-0.10013	0.0937	0.045777	0.006451	0.081473	-0.041177	0.030809	-0.075537	-0.076678
Ornithine	0.011264	-0.21503	0.047948	-0.070003	-0.064951	0.018371	-0.04999	-0.07907	-0.076251	-0.087432	-0.011863	0.0077424
Orotic acd	-0.010988	-0.18768	-0.17881	-0.0095184	-0.061396	0.030598	-0.055777	-0.015055	0.023655	0.0063819	0.032013	-0.052585
Palmitic acid	-0.099956	0.043883	0.027112	-0.21301	0.077967	-0.3289	-0.11675	0.1326	-0.14387	0.056059	-0.11805	-0.053866
Palmitoleic acid	-0.096901	0.037186	0.16175	-0.075042	0.13782	0.097008	0.029232	-0.1504	0.079789	-0.14102	0.071524	0.039705
PEP	0.11587	0.027726	-0.010665	-0.052108	-0.031453	-0.00082158	0.0075791	0.026523	-0.0113	-0.023506	0.012247	-0.0094898
Phenylalanine	0.10992	-0.074942	0.017244	0.0027132	0.01061	0.0153	-0.067018	0.0099856	-0.050102	-0.041299	0.0087078	0.018018
Phytosphingosine	-0.077468	0.033255	0.23036	-0.11279	0.13432	-0.13877	-0.17256	-0.018118	0.17207	-0.010385	-0.066535	0.0063395
Proline	0.096703	0.10732	-0.020371	-0.014525	-0.0038304	0.069745	-0.0093055	-0.21346	0.00044319	0.38236	-0.072632	0.034501
Putrescine	0.060871	-0.18324	0.044329	-0.0095445	0.014374	-0.1171	0.14586	0.03794	0.016527	0.074066	-0.027526	0.014285
Pyroglutamate	-0.11005	0.023526	0.10634	0.03251	-0.064774	-0.0066594	0.040242	0.035875	-0.069726	0.011507	0.13371	0.061581
Ribose	0.10776	0.073156	0.057468	0.027804	0.052271	0.011242	-0.085675	-0.054175	-0.10847	-0.078731	0.015712	0.04183
Saccharopine	0.079213	0.15775	-0.045661	-0.0030649	0.0019739	-0.0026125	-0.019851	0.11216	0.0063583	-0.18027	0.048933	0.07107
Sedoheptulose-7P	0.079817	0.15028	-0.042236	-0.097552	-0.050776	-0.11448	0.19231	0.046202	0.0041202	-0.075516	0.00047951	0.025061
Serine	-0.083698	-0.1522	-0.017304	-0.028735	-0.05151	-0.049796	-0.027539	-0.069631	0.040466	0.072599	0.093748	-0.080206
Squalene	-0.06836	-0.021791	-0.27895	-0.016762	-0.036588	0.077241	0.051691	0.036665	-0.064023	0.041964	-0.081187	-0.10455
Spermidine	0.097839	-0.11431	0.028713	-0.0994	-0.067612	-0.011646	0.019845	-0.043755	-0.057151	0.012616	-0.020731	0.017785
Stearic acid	-0.083054	0.025902	0.060186	-0.31415	0.11093	-0.47129	-0.094388	-0.15125	0.18367	-0.094794	0.024703	-0.049485
Threonine	0.11496	0.042316	0.011512	0.0086676	0.023115	0.011143	-0.032153	-0.00067934	-0.020177	0.011521	0.0082716	-0.012095
Trehalose	0.1159	0.015245	-0.00039361	-0.078461	-0.038515	-0.020104	0.047787	0.049445	-0.030876	-0.046032	0.026227	0.029695
Tryptophan	0.11398	0.049913	-0.010893	0.004631	0.01859	0.009649	-0.045177	-0.012986	-0.053364	-0.047546	0.015854	0.0095078
Tyrosine	0.11682	0.019171	-0.0029455	-0.011918	0.0025537	0.0035372	-0.011967	0.03111	-0.0039013	0.0029649	0.013664	-0.012977
Tyrosol	0.089335	0.14072	-0.039846	-0.029357	-0.012721	0.0018249	0.011235	0.0049832	-0.012309	-0.033278	0.017328	0.0057495
UMP	0.11549	0.037668	0.0044115	0.0086367	0.026524	-0.012605	0.0023259	0.011241	-0.015972	0.011193	0.0088188	0.03989
Uracil	0.10315	-0.10421	0.020727	0.0086902	0.01027	0.0014958	-0.027488	0.032197	-0.016064	0.012789	0.012141	0.013926
Uridine	0.086853	0.1478	0.012837	0.0031975	0.040131	-0.025887	0.020307	-0.01393	-0.024974	-0.019804	0.019166	-0.028674
Valine	0.11543	-0.03588	0.011509	-0.026765	-0.012927	0.02258	-0.049297	-0.011882	-0.040969	0.0035844	0.001468	-0.033252
Succinate	0.10756	0.086835	-0.023575	-0.017885	-0.00082496	0.0052847	0.001517	-0.0023434	-0.019475	0.0040412	0.0092225	0.025216
Pyruvate	0.098174	-0.11752	0.037531	0.018075	0.029218	0.015101	-0.061001	-0.014267	-0.05357	0.0081927	0.0080982	0.042728
Xanthine	0.11121	-0.05798	0.0087117	0.031424	0.037941	-0.072181	0.09384	0.16796	0.096692	0.034868	0.023413	0.024038
