# Supplementary material for: Mitochondrial Metabolomics of Sym1-Depleted Yeast Cells Revealed Them to Be Lysine Auxotroph
Source: Cells. 2023 Feb 22;12(5):692. doi: 10.3390/cells12050692 (PMC10000845; doi:10.3390/cells12050692)
Supplement: Supplementary file 1 [file cells-12-00692-s001.zip › Supplementary Table S3.xlsx]

## Sheet: anova_posthoc
Metabolite	f.value	p.value	=-LOG10(p)	FDR	Tukey's HSD
Lysine	39442	5.1403e-17	16.289	5.5515e-15	Cyto_sym1Δ-Cyto_WT	Mito_WT-Cyto_WT	Mito_sym1Δ-Cyto_WT	Mito_WT-Cyto_sym1Δ	Mito_sym1Δ-Cyto_sym1Δ
Uracil	21989	5.3197e-16	15.274	2.8726e-14	Cyto_sym1Δ-Cyto_WT	Mito_WT-Cyto_WT	Mito_sym1Δ-Cyto_WT	Mito_WT-Cyto_sym1Δ	Mito_sym1Δ-Cyto_sym1Δ
CMP	14597	2.7387e-15	14.562	9.8592e-14	Cyto_sym1Δ-Cyto_WT	Mito_WT-Cyto_WT	Mito_sym1Δ-Cyto_WT	Mito_WT-Cyto_sym1Δ	Mito_sym1Δ-Cyto_sym1Δ	Mito_sym1Δ-Mito_WT
NAD+	12158	5.69e-15	14.245	1.3788e-13	Mito_WT-Cyto_WT	Mito_sym1Δ-Cyto_WT	Mito_WT-Cyto_sym1Δ	Mito_sym1Δ-Cyto_sym1Δ	Mito_sym1Δ-Mito_WT
UMP	11813	6.3833e-15	14.195	1.3788e-13	Cyto_sym1Δ-Cyto_WT	Mito_WT-Cyto_WT	Mito_sym1Δ-Cyto_WT	Mito_WT-Cyto_sym1Δ	Mito_sym1Δ-Cyto_sym1Δ	Mito_sym1Δ-Mito_WT
Uridine	7925.5	3.1495e-14	13.502	4.8763e-13	Cyto_sym1Δ-Cyto_WT	Mito_WT-Cyto_WT	Mito_sym1Δ-Cyto_WT	Mito_WT-Cyto_sym1Δ	Mito_sym1Δ-Cyto_sym1Δ	Mito_sym1Δ-Mito_WT
Carbamoyl-Asp	7918.5	3.1605e-14	13.5	4.8763e-13	Cyto_sym1Δ-Cyto_WT	Mito_WT-Cyto_WT	Mito_sym1Δ-Cyto_WT	Mito_WT-Cyto_sym1Δ	Mito_sym1Δ-Cyto_sym1Δ	Mito_sym1Δ-Mito_WT
Arginine	7607.9	3.7089e-14	13.431	5.007e-13	Cyto_sym1Δ-Cyto_WT	Mito_WT-Cyto_WT	Mito_sym1Δ-Cyto_WT	Mito_WT-Cyto_sym1Δ	Mito_sym1Δ-Cyto_sym1Δ	Mito_sym1Δ-Mito_WT
Isoleucine	6017.2	9.4741e-14	13.023	1.1369e-12	Cyto_sym1Δ-Cyto_WT	Mito_WT-Cyto_WT	Mito_sym1Δ-Cyto_WT	Mito_WT-Cyto_sym1Δ	Mito_sym1Δ-Cyto_sym1Δ
Leucine	4190	4.0264e-13	12.395	4.3485e-12	Cyto_sym1Δ-Cyto_WT	Mito_WT-Cyto_WT	Mito_sym1Δ-Cyto_WT	Mito_WT-Cyto_sym1Δ	Mito_sym1Δ-Cyto_sym1Δ
Kynurenine	3537.6	7.9197e-13	12.101	7.7757e-12	Cyto_sym1Δ-Cyto_WT	Mito_WT-Cyto_sym1Δ	Mito_sym1Δ-Cyto_sym1Δ
Citrulline	3450.8	8.7463e-13	12.058	7.8716e-12	Cyto_sym1Δ-Cyto_WT	Mito_WT-Cyto_WT	Mito_sym1Δ-Cyto_WT	Mito_WT-Cyto_sym1Δ	Mito_sym1Δ-Cyto_sym1Δ	Mito_sym1Δ-Mito_WT
Histidine	2478.3	3.2835e-12	11.484	2.6054e-11	Mito_WT-Cyto_WT	Mito_sym1Δ-Cyto_WT	Mito_WT-Cyto_sym1Δ	Mito_sym1Δ-Cyto_sym1Δ
Threonine	2460.8	3.3773e-12	11.471	2.6054e-11	Cyto_sym1Δ-Cyto_WT	Mito_WT-Cyto_WT	Mito_sym1Δ-Cyto_WT	Mito_WT-Cyto_sym1Δ	Mito_sym1Δ-Cyto_sym1Δ	Mito_sym1Δ-Mito_WT
Orotic acd	2332.4	4.1839e-12	11.378	3.0124e-11	Cyto_sym1Δ-Cyto_WT	Mito_sym1Δ-Cyto_WT	Mito_WT-Cyto_sym1Δ	Mito_sym1Δ-Cyto_sym1Δ	Mito_sym1Δ-Mito_WT
Hypoxanthine	1707.4	1.4543e-11	10.837	9.8168e-11	Cyto_sym1Δ-Cyto_WT	Mito_WT-Cyto_WT	Mito_sym1Δ-Cyto_WT	Mito_WT-Cyto_sym1Δ	Mito_sym1Δ-Cyto_sym1Δ
Galactitol	1520.2	2.3119e-11	10.636	1.4688e-10	Cyto_sym1Δ-Cyto_WT	Mito_WT-Cyto_WT	Mito_sym1Δ-Cyto_WT	Mito_WT-Cyto_sym1Δ	Mito_sym1Δ-Cyto_sym1Δ	Mito_sym1Δ-Mito_WT
Adenosine	1131.4	7.516e-11	10.124	4.5096e-10	Cyto_sym1Δ-Cyto_WT	Mito_WT-Cyto_WT	Mito_sym1Δ-Cyto_WT	Mito_WT-Cyto_sym1Δ	Mito_sym1Δ-Cyto_sym1Δ
Pyruvate	1097.9	8.473e-11	10.072	4.8162e-10	Cyto_sym1Δ-Cyto_WT	Mito_WT-Cyto_WT	Mito_sym1Δ-Cyto_WT	Mito_WT-Cyto_sym1Δ	Mito_sym1Δ-Cyto_sym1Δ
Phenylalanine	966.08	1.4114e-10	9.8504	7.6216e-10	Cyto_sym1Δ-Cyto_WT	Mito_WT-Cyto_WT	Mito_sym1Δ-Cyto_WT	Mito_WT-Cyto_sym1Δ	Mito_sym1Δ-Cyto_sym1Δ
Tyrosine	885.4	1.9983e-10	9.6993	1.0277e-09	Cyto_sym1Δ-Cyto_WT	Mito_WT-Cyto_WT	Mito_sym1Δ-Cyto_WT	Mito_WT-Cyto_sym1Δ	Mito_sym1Δ-Cyto_sym1Δ
Tryptophan	807.15	2.8897e-10	9.5392	1.4186e-09	Cyto_sym1Δ-Cyto_WT	Mito_WT-Cyto_WT	Mito_sym1Δ-Cyto_WT	Mito_WT-Cyto_sym1Δ	Mito_sym1Δ-Cyto_sym1Δ
Cytidine	726.58	4.3938e-10	9.3572	2.0632e-09	Cyto_sym1Δ-Cyto_WT	Mito_WT-Cyto_WT	Mito_sym1Δ-Cyto_WT	Mito_WT-Cyto_sym1Δ	Mito_sym1Δ-Cyto_sym1Δ
Succinate	686.86	5.4968e-10	9.2599	2.4735e-09	Cyto_sym1Δ-Cyto_WT	Mito_WT-Cyto_WT	Mito_sym1Δ-Cyto_WT	Mito_WT-Cyto_sym1Δ	Mito_sym1Δ-Cyto_sym1Δ
3-hydroxy-3-methylglutaric acid	668.67	6.1167e-10	9.2135	2.6424e-09	Cyto_sym1Δ-Cyto_WT	Mito_WT-Cyto_sym1Δ	Mito_sym1Δ-Cyto_sym1Δ
GSH	647.06	6.9718e-10	9.1567	2.896e-09	Cyto_sym1Δ-Cyto_WT	Mito_WT-Cyto_WT	Mito_sym1Δ-Cyto_WT	Mito_WT-Cyto_sym1Δ	Mito_sym1Δ-Cyto_sym1Δ	Mito_sym1Δ-Mito_WT
Gentiobiose	570.23	1.1531e-09	8.9381	4.6123e-09	Cyto_sym1Δ-Cyto_WT	Mito_WT-Cyto_WT	Mito_sym1Δ-Cyto_WT	Mito_WT-Cyto_sym1Δ	Mito_sym1Δ-Cyto_sym1Δ
Myristic acid	486.91	2.1615e-09	8.6652	8.2601e-09	Mito_WT-Cyto_WT	Mito_sym1Δ-Cyto_WT	Mito_WT-Cyto_sym1Δ	Mito_sym1Δ-Cyto_sym1Δ	Mito_sym1Δ-Mito_WT
Maltose	483.76	2.218e-09	8.654	8.2601e-09	Mito_WT-Cyto_WT	Mito_sym1Δ-Cyto_WT	Mito_WT-Cyto_sym1Δ	Mito_sym1Δ-Cyto_sym1Δ
Cysteine	439.78	3.2396e-09	8.4895	1.1663e-08	Cyto_sym1Δ-Cyto_WT	Mito_WT-Cyto_WT	Mito_sym1Δ-Cyto_WT	Mito_WT-Cyto_sym1Δ	Mito_sym1Δ-Cyto_sym1Δ
Alanine	429.15	3.5702e-09	8.4473	1.2217e-08	Cyto_sym1Δ-Cyto_WT	Mito_WT-Cyto_WT	Mito_sym1Δ-Cyto_WT	Mito_WT-Cyto_sym1Δ	Mito_sym1Δ-Cyto_sym1Δ
Glucose-6P	427.66	3.6198e-09	8.4413	1.2217e-08	Cyto_sym1Δ-Cyto_WT	Mito_WT-Cyto_WT	Mito_sym1Δ-Cyto_WT	Mito_WT-Cyto_sym1Δ	Mito_sym1Δ-Cyto_sym1Δ
Malate	419.36	3.9131e-09	8.4075	1.2807e-08	Cyto_sym1Δ-Cyto_WT	Mito_WT-Cyto_WT	Mito_sym1Δ-Cyto_WT	Mito_WT-Cyto_sym1Δ	Mito_sym1Δ-Cyto_sym1Δ
Valine	404.53	4.5146e-09	8.3454	1.434e-08	Cyto_sym1Δ-Cyto_WT	Mito_WT-Cyto_WT	Mito_sym1Δ-Cyto_WT	Mito_WT-Cyto_sym1Δ	Mito_sym1Δ-Cyto_sym1Δ
Lauric acid	397.55	4.8374e-09	8.3154	1.4927e-08	Mito_WT-Cyto_WT	Mito_sym1Δ-Cyto_WT	Mito_WT-Cyto_sym1Δ	Mito_sym1Δ-Cyto_sym1Δ	Mito_sym1Δ-Mito_WT
Tyrosol	340.08	8.9893e-09	8.0463	2.6968e-08	Cyto_sym1Δ-Cyto_WT	Mito_WT-Cyto_WT	Mito_sym1Δ-Cyto_WT	Mito_WT-Cyto_sym1Δ	Mito_sym1Δ-Cyto_sym1Δ
Myo-inositol	303.09	1.419e-08	7.848	4.1418e-08	Mito_WT-Cyto_WT	Mito_sym1Δ-Cyto_WT	Mito_WT-Cyto_sym1Δ	Mito_sym1Δ-Cyto_sym1Δ	Mito_sym1Δ-Mito_WT
Mannose-6P	255.56	2.7874e-08	7.5548	7.9221e-08	Cyto_sym1Δ-Cyto_WT	Mito_WT-Cyto_WT	Mito_sym1Δ-Cyto_WT	Mito_WT-Cyto_sym1Δ	Mito_sym1Δ-Cyto_sym1Δ
Glycolic acid	248.9	3.0941e-08	7.5095	8.502e-08	Mito_WT-Cyto_WT	Mito_sym1Δ-Cyto_WT	Mito_WT-Cyto_sym1Δ	Mito_sym1Δ-Cyto_sym1Δ
Gluconic acid	247.79	3.1489e-08	7.5018	8.502e-08	Cyto_sym1Δ-Cyto_WT	Mito_WT-Cyto_WT	Mito_sym1Δ-Cyto_WT
dCytidine	227.37	4.4235e-08	7.3542	1.1652e-07	Mito_WT-Cyto_WT	Mito_sym1Δ-Cyto_WT	Mito_WT-Cyto_sym1Δ	Mito_sym1Δ-Cyto_sym1Δ	Mito_sym1Δ-Mito_WT
Ribose	209.72	6.0852e-08	7.2157	1.5648e-07	Cyto_sym1Δ-Cyto_WT	Mito_WT-Cyto_WT	Mito_sym1Δ-Cyto_WT	Mito_WT-Cyto_sym1Δ	Mito_sym1Δ-Cyto_sym1Δ	Mito_sym1Δ-Mito_WT
Serine	208.29	6.2511e-08	7.204	1.57e-07	Cyto_sym1Δ-Cyto_WT	Mito_WT-Cyto_WT	Mito_WT-Cyto_sym1Δ	Mito_sym1Δ-Cyto_sym1Δ	Mito_sym1Δ-Mito_WT
Squalene	199.16	7.4601e-08	7.1273	1.8311e-07	Mito_WT-Cyto_WT	Mito_WT-Cyto_sym1Δ	Mito_sym1Δ-Mito_WT
3-PG	196.31	7.8957e-08	7.1026	1.895e-07	Cyto_sym1Δ-Cyto_WT	Mito_WT-Cyto_WT	Mito_sym1Δ-Cyto_WT	Mito_WT-Cyto_sym1Δ	Mito_sym1Δ-Cyto_sym1Δ
Glucose	181.3	1.0801e-07	6.9665	2.536e-07	Mito_WT-Cyto_WT	Mito_sym1Δ-Cyto_WT	Mito_WT-Cyto_sym1Δ	Mito_sym1Δ-Cyto_sym1Δ
Cystathionine	180.28	1.1045e-07	6.9568	2.5381e-07	Cyto_sym1Δ-Cyto_WT	Mito_WT-Cyto_WT	Mito_WT-Cyto_sym1Δ	Mito_sym1Δ-Cyto_sym1Δ
Glutamate	177.45	1.1755e-07	6.9298	2.6448e-07	Cyto_sym1Δ-Cyto_WT	Mito_WT-Cyto_WT	Mito_sym1Δ-Cyto_WT	Mito_WT-Cyto_sym1Δ	Mito_sym1Δ-Cyto_sym1Δ
PEP	171.33	1.3492e-07	6.8699	2.9738e-07	Cyto_sym1Δ-Cyto_WT	Mito_WT-Cyto_WT	Mito_sym1Δ-Cyto_WT	Mito_WT-Cyto_sym1Δ	Mito_sym1Δ-Cyto_sym1Δ
Methionine	169	1.4239e-07	6.8465	3.0755e-07	Cyto_sym1Δ-Cyto_WT	Mito_WT-Cyto_WT	Mito_sym1Δ-Cyto_WT	Mito_WT-Cyto_sym1Δ	Mito_sym1Δ-Cyto_sym1Δ
Homoserine	162.84	1.6479e-07	6.7831	3.4896e-07	Cyto_sym1Δ-Cyto_WT	Mito_WT-Cyto_WT	Mito_sym1Δ-Cyto_WT	Mito_WT-Cyto_sym1Δ	Mito_sym1Δ-Cyto_sym1Δ
Cytosine	142.91	2.7503e-07	6.5606	5.7123e-07	Cyto_sym1Δ-Cyto_WT	Mito_WT-Cyto_WT	Mito_sym1Δ-Cyto_WT	Mito_WT-Cyto_sym1Δ	Mito_sym1Δ-Cyto_sym1Δ	Mito_sym1Δ-Mito_WT
Nicotinamide	135.28	3.4098e-07	6.4673	6.8879e-07	Mito_WT-Cyto_WT	Mito_WT-Cyto_sym1Δ	Mito_sym1Δ-Mito_WT
Pyroglutamate	134.94	3.4439e-07	6.4629	6.8879e-07	Mito_WT-Cyto_WT	Mito_sym1Δ-Cyto_WT	Mito_WT-Cyto_sym1Δ	Mito_sym1Δ-Cyto_sym1Δ	Mito_sym1Δ-Mito_WT
4-Aminobutanoic acid	123.45	4.8777e-07	6.3118	9.578e-07	Cyto_sym1Δ-Cyto_WT	Mito_WT-Cyto_WT	Mito_sym1Δ-Cyto_WT	Mito_WT-Cyto_sym1Δ	Mito_sym1Δ-Cyto_sym1Δ
AMP	121.44	5.2007e-07	6.2839	9.9623e-07	Cyto_sym1Δ-Cyto_WT	Mito_WT-Cyto_WT	Mito_sym1Δ-Cyto_WT	Mito_WT-Cyto_sym1Δ	Mito_sym1Δ-Cyto_sym1Δ
NADP+	121.1	5.2579e-07	6.2792	9.9623e-07	Cyto_sym1Δ-Cyto_WT	Mito_WT-Cyto_WT	Mito_sym1Δ-Cyto_WT	Mito_sym1Δ-Cyto_sym1Δ	Mito_sym1Δ-Mito_WT
Citrate	119.22	5.589e-07	6.2527	1.0407e-06	Cyto_sym1Δ-Cyto_WT	Mito_WT-Cyto_WT	Mito_sym1Δ-Cyto_WT	Mito_WT-Cyto_sym1Δ	Mito_sym1Δ-Cyto_sym1Δ
Decanoic acid	106.37	8.7176e-07	6.0596	1.5958e-06	Mito_WT-Cyto_WT	Mito_sym1Δ-Cyto_WT	Mito_WT-Cyto_sym1Δ	Mito_sym1Δ-Cyto_sym1Δ
Saccharopine	104.35	9.3928e-07	6.0272	1.6907e-06	Cyto_sym1Δ-Cyto_WT	Mito_WT-Cyto_sym1Δ	Mito_sym1Δ-Cyto_sym1Δ
dCMP	103.15	9.8233e-07	6.0077	1.7392e-06	Cyto_sym1Δ-Cyto_WT	Mito_WT-Cyto_sym1Δ	Mito_sym1Δ-Cyto_sym1Δ
Ornithine	99.763	1.1187e-06	5.9513	1.9486e-06	Cyto_sym1Δ-Cyto_WT	Mito_WT-Cyto_WT	Mito_sym1Δ-Cyto_WT	Mito_WT-Cyto_sym1Δ	Mito_sym1Δ-Cyto_sym1Δ
GSSG	93.332	1.4489e-06	5.839	2.4838e-06	Mito_WT-Cyto_WT	Mito_sym1Δ-Cyto_WT	Mito_WT-Cyto_sym1Δ	Mito_sym1Δ-Cyto_sym1Δ	Mito_sym1Δ-Mito_WT
2-AAA	92.302	1.5126e-06	5.8203	2.5521e-06	Cyto_sym1Δ-Cyto_WT	Mito_WT-Cyto_sym1Δ	Mito_sym1Δ-Cyto_sym1Δ
Argininosuccinate	91.937	1.536e-06	5.8136	2.5521e-06	Mito_WT-Cyto_WT	Mito_sym1Δ-Cyto_WT	Mito_WT-Cyto_sym1Δ	Mito_sym1Δ-Cyto_sym1Δ
Trehalose	91.032	1.596e-06	5.797	2.6116e-06	Mito_WT-Cyto_WT	Mito_sym1Δ-Cyto_WT	Mito_WT-Cyto_sym1Δ	Mito_sym1Δ-Cyto_sym1Δ
GSH_GSSG	82.926	2.2896e-06	5.6402	3.6906e-06	Cyto_sym1Δ-Cyto_WT	Mito_WT-Cyto_WT	Mito_WT-Cyto_sym1Δ	Mito_sym1Δ-Cyto_sym1Δ	Mito_sym1Δ-Mito_WT
5-Methyluridine	80.908	2.518e-06	5.5989	3.9579e-06	Mito_WT-Cyto_WT	Mito_sym1Δ-Cyto_WT	Mito_WT-Cyto_sym1Δ	Mito_sym1Δ-Cyto_sym1Δ
Xanthine	80.619	2.553e-06	5.5929	3.9579e-06	Cyto_sym1Δ-Cyto_WT	Mito_WT-Cyto_WT	Mito_sym1Δ-Cyto_WT	Mito_WT-Cyto_sym1Δ	Mito_sym1Δ-Cyto_sym1Δ
Glutamine	80.519	2.5653e-06	5.5909	3.9579e-06	Cyto_sym1Δ-Cyto_WT	Mito_WT-Cyto_sym1Δ	Mito_sym1Δ-Cyto_sym1Δ
1-Monopalmitin	76.228	3.1683e-06	5.4992	4.8194e-06	Mito_WT-Cyto_WT	Mito_sym1Δ-Cyto_WT	Mito_WT-Cyto_sym1Δ	Mito_sym1Δ-Cyto_sym1Δ
Lanosterol	75.279	3.3249e-06	5.4782	4.9874e-06	Mito_WT-Cyto_WT	Mito_WT-Cyto_sym1Δ	Mito_sym1Δ-Mito_WT
Fumarate	71.06	4.1506e-06	5.3819	6.1406e-06	Cyto_sym1Δ-Cyto_WT	Mito_WT-Cyto_sym1Δ	Mito_sym1Δ-Cyto_sym1Δ
Eicosanoic acid	70.391	4.3041e-06	5.3661	6.2817e-06	Mito_WT-Cyto_WT	Mito_sym1Δ-Cyto_WT	Mito_WT-Cyto_sym1Δ	Mito_sym1Δ-Cyto_sym1Δ
14-Demethyllanosterol	70.063	4.382e-06	5.3583	6.3101e-06	Mito_WT-Cyto_WT	Mito_WT-Cyto_sym1Δ	Mito_sym1Δ-Mito_WT
Spermidine	65.36	5.7191e-06	5.2427	8.1271e-06	Cyto_sym1Δ-Cyto_WT	Mito_WT-Cyto_WT	Mito_sym1Δ-Cyto_WT	Mito_WT-Cyto_sym1Δ	Mito_sym1Δ-Cyto_sym1Δ
Putrescine	64.468	6.0282e-06	5.2198	8.4551e-06	Cyto_sym1Δ-Cyto_WT	Mito_WT-Cyto_WT	Mito_sym1Δ-Cyto_WT
1-Octadecanol	63.371	6.4368e-06	5.1913	8.9125e-06	Mito_WT-Cyto_WT	Mito_sym1Δ-Cyto_WT	Mito_WT-Cyto_sym1Δ	Mito_sym1Δ-Cyto_sym1Δ
Hexacosanoic acid	60.974	7.4583e-06	5.1274	1.0196e-05	Mito_WT-Cyto_WT	Mito_sym1Δ-Cyto_WT	Mito_WT-Cyto_sym1Δ	Mito_sym1Δ-Cyto_sym1Δ	Mito_sym1Δ-Mito_WT
2-PG	58.708	8.6166e-06	5.0647	1.1632e-05	Mito_WT-Cyto_WT	Mito_sym1Δ-Cyto_WT	Mito_WT-Cyto_sym1Δ	Mito_sym1Δ-Cyto_sym1Δ
Glyceric acid	58.482	8.7441e-06	5.0583	1.1659e-05	Mito_WT-Cyto_WT	Mito_sym1Δ-Cyto_WT	Mito_WT-Cyto_sym1Δ	Mito_sym1Δ-Cyto_sym1Δ
O-Phosphocolamine	51.188	1.4498e-05	4.8387	1.9095e-05	Mito_WT-Cyto_WT	Mito_sym1Δ-Cyto_WT	Mito_WT-Cyto_sym1Δ	Mito_sym1Δ-Cyto_sym1Δ
Aspartate	41.552	3.1756e-05	4.4982	4.1321e-05	Mito_WT-Cyto_WT	Mito_sym1Δ-Cyto_WT	Mito_WT-Cyto_sym1Δ	Mito_sym1Δ-Cyto_sym1Δ
Glycerol-3P	40.198	3.5932e-05	4.4445	4.6198e-05	Mito_WT-Cyto_WT	Mito_sym1Δ-Cyto_WT	Mito_sym1Δ-Cyto_sym1Δ	Mito_sym1Δ-Mito_WT
Cadaverine	37.838	4.4997e-05	4.3468	5.6811e-05	Cyto_sym1Δ-Cyto_WT	Mito_WT-Cyto_WT	Mito_sym1Δ-Cyto_WT
Sedoheptulose-7P	37.784	4.5238e-05	4.3445	5.6811e-05	Cyto_sym1Δ-Cyto_WT	Mito_WT-Cyto_sym1Δ	Mito_sym1Δ-Cyto_sym1Δ
Lactose	37.64	4.5884e-05	4.3383	5.696e-05	Cyto_sym1Δ-Cyto_WT	Mito_WT-Cyto_WT	Mito_sym1Δ-Cyto_WT	Mito_WT-Cyto_sym1Δ	Mito_sym1Δ-Cyto_sym1Δ
Palmitoleic acid	36.519	5.1321e-05	4.2897	6.2985e-05	Mito_WT-Cyto_WT	Mito_sym1Δ-Cyto_WT	Mito_WT-Cyto_sym1Δ	Mito_sym1Δ-Cyto_sym1Δ	Mito_sym1Δ-Mito_WT
Oleic acid	32.499	7.8867e-05	4.1031	9.5703e-05	Mito_sym1Δ-Cyto_WT	Mito_sym1Δ-Cyto_sym1Δ	Mito_sym1Δ-Mito_WT
Proline	29.397	0.00011376	3.944	0.00013651	Cyto_sym1Δ-Cyto_WT	Mito_WT-Cyto_sym1Δ	Mito_sym1Δ-Cyto_sym1Δ
Phytosphingosine	29.182	0.00011682	3.9325	0.00013865	Mito_sym1Δ-Cyto_WT	Mito_sym1Δ-Cyto_sym1Δ	Mito_sym1Δ-Mito_WT
Galactinol	27.456	0.0001457	3.8365	0.00017104	Mito_sym1Δ-Cyto_WT	Mito_sym1Δ-Cyto_sym1Δ	Mito_sym1Δ-Mito_WT
3-Hydroxybutyric acid	24.167	0.00023027	3.6378	0.00026741	Mito_WT-Cyto_WT	Mito_sym1Δ-Cyto_WT	Mito_WT-Cyto_sym1Δ	Mito_sym1Δ-Cyto_sym1Δ
Homocysteine	17.397	0.00072598	3.1391	0.0008341	Cyto_sym1Δ-Cyto_WT	Mito_WT-Cyto_sym1Δ	Mito_sym1Δ-Cyto_sym1Δ
Glycine	14.966	0.0012068	2.9184	0.0013719	Mito_WT-Cyto_WT	Mito_WT-Cyto_sym1Δ	Mito_sym1Δ-Mito_WT
Adenine	13.672	0.0016281	2.7883	0.0018316	Mito_WT-Cyto_WT	Mito_sym1Δ-Cyto_WT	Mito_WT-Cyto_sym1Δ	Mito_sym1Δ-Cyto_sym1Δ
Ergosterol	10.682	0.003592	2.4447	0.0039993	Mito_WT-Cyto_WT	Mito_sym1Δ-Cyto_WT	Mito_WT-Cyto_sym1Δ	Mito_sym1Δ-Cyto_sym1Δ
Methyl phosphate	9.5639	0.005052	2.2965	0.0055675	Mito_WT-Cyto_WT	Mito_sym1Δ-Cyto_WT	Mito_WT-Cyto_sym1Δ	Mito_sym1Δ-Cyto_sym1Δ
Palmitic acid	9.0456	0.0059791	2.2234	0.0065227	Mito_WT-Cyto_WT	Mito_sym1Δ-Cyto_WT	Mito_sym1Δ-Cyto_sym1Δ
Aminomalonic acid	9.0134	0.0060435	2.2187	0.0065269	Mito_WT-Cyto_WT	Mito_sym1Δ-Cyto_WT	Mito_WT-Cyto_sym1Δ
Lactate	5.7369	0.021542	1.6667	0.023035	Cyto_sym1Δ-Cyto_WT	Mito_WT-Cyto_WT	Mito_sym1Δ-Cyto_WT
