# Supplementary material for: Mitochondrial Metabolomics of Sym1-Depleted Yeast Cells Revealed Them to Be Lysine Auxotroph
Source: Cells. 2023 Feb 22;12(5):692. doi: 10.3390/cells12050692 (PMC10000845; doi:10.3390/cells12050692)
Supplement: Supplementary file 1 [file cells-12-00692-s001.zip › Supplementary Table S4.xlsx]

## Sheet: Sheet1
Inclusion list for the targeted MS2 analysis
Cyto_sym1∆		Cyto_WT		Mito_sym1∆		Mito_WT
Prec. m/z	RT/min	Prec. m/z	RT/min	Prec. m/z	RT/min	Prec. m/z	RT/min
84.0448	5.264	72.0811	8.968	86.024	2.162	137.046	0.993
86.024	1.946	112.087	1.573	126.066	0.941	157.025	1.961
88.1126	0.938	130.098	1.565	130.05	5.25	158.093	8.033
126.067	0.709	146.092	2.547	147.077	5.247	183.087	3.004
130.05	2.069	159.077	3.757	187.031	5.246	292.198	8.037
130.05	5.264	166.073	1.111	211.12	1.373	337.172	8.6
147.077	5.264	168.093	1.944	234.109	4.733	349.231	8.031
156.15	7.429	174.077	0.692	235.093	2.175	447.347	1.953
158.081	5.602	175.119	10.346	248.088	2.118	493.426	1.954
174.077	1.246	195.087	2.385	258.109	0.966	495.44	1.964
176.103	6.12	204.134	8.633	260.116	0.966	519.441	1.948
187.031	5.26	217.13	4.885	267.147	1.052	521.457	1.948
213.171	8.076	219.134	4.518	316.115	1.456	523.472	1.951
213.208	12.893	220.092	7.225	339.067	2.154	605.551	0.606
219.098	6.353	225.088	0.725	344.228	0.588	648.46	0.584
224.059	7.055	231.145	6.61	348.141	4.941	648.461	0.874
234.109	4.723	232.141	9.168	365.151	1.718	650.476	0.876
235.093	2.383	234.109	6.759	388.255	0.593	675.676	2.169
235.093	1.928	239.104	0.608	418.194	5.959	676.492	0.856
242.114	1.431	243.11	8.85	432.281	0.593	678.506	0.851
242.114	8.316	246.145	5.481	434.163	5.246	688.492	0.9
251.07	6.363	248.124	6.699	476.307	0.595	702.507	0.827
258.109	0.951	262.153	9.302	520.334	0.601	704.523	0.822
260.115	0.954	265.112	3.062	549.198	8.646	707.537	0.82
272.125	0.74	274.188	7.846	607.032	0.587	732.481	1.977
278.124	6.34	274.213	7.512	626.451	5.257	744.554	0.576
286.152	4.64	276.167	8.949	734.497	2.101	760.513	1.955
293.115	4.581	280.202	5.471			781.487	1.947
297.12	1.118	281.048	4.462			784.517	0.612
297.157	1.69	284.099	2.383			790.56	0.583
304.115	5.499	288.203	6.827			792.575	0.807
305.101	6.926	288.203	7.183			793.427	1.952
306.13	4.6	304.165	5.899			818.593	0.781
315.059	7.065	316.087	2.38
319.151	6.553	319.162	9.189
326.05	4.579	319.162	6.352
329.146	6.268	319.162	5.591
337.124	6.347	319.162	8.614
348.141	4.966	328.188	9.123
353.156	6.976	337.173	8.743
353.156	6.453	349.232	8.043
378.151	5.588	350.204	8.495
381.252	5.34	361.245	7.958
385.182	6.924	374.209	5.501
386.097	4.437	380.228	2.536
411.161	6.786	389.227	2.536
412.193	7.651	426.126	0.993
412.193	7.352	440.236	9.293
416.13	0.986	523.343	8.036
418.194	5.958	655.039	3.759
424.102	7.902	697.454	8.038
484.143	5.507	704.523	0.837
492.176	8.327	744.554	0.582
499.116	10.41	760.512	1.951
549.198	8.657	760.583	0.583
549.198	8.89	760.583	0.808
633.235	8.815	794.548	2.553
